# Supplementary material
Source: HighWire-hosted journal article supplement (doi:10.1101/rna.075507.120)
Supplement: Supplemental_Fig_S1.docx [file Supplemental_Fig_S1.docx]

**
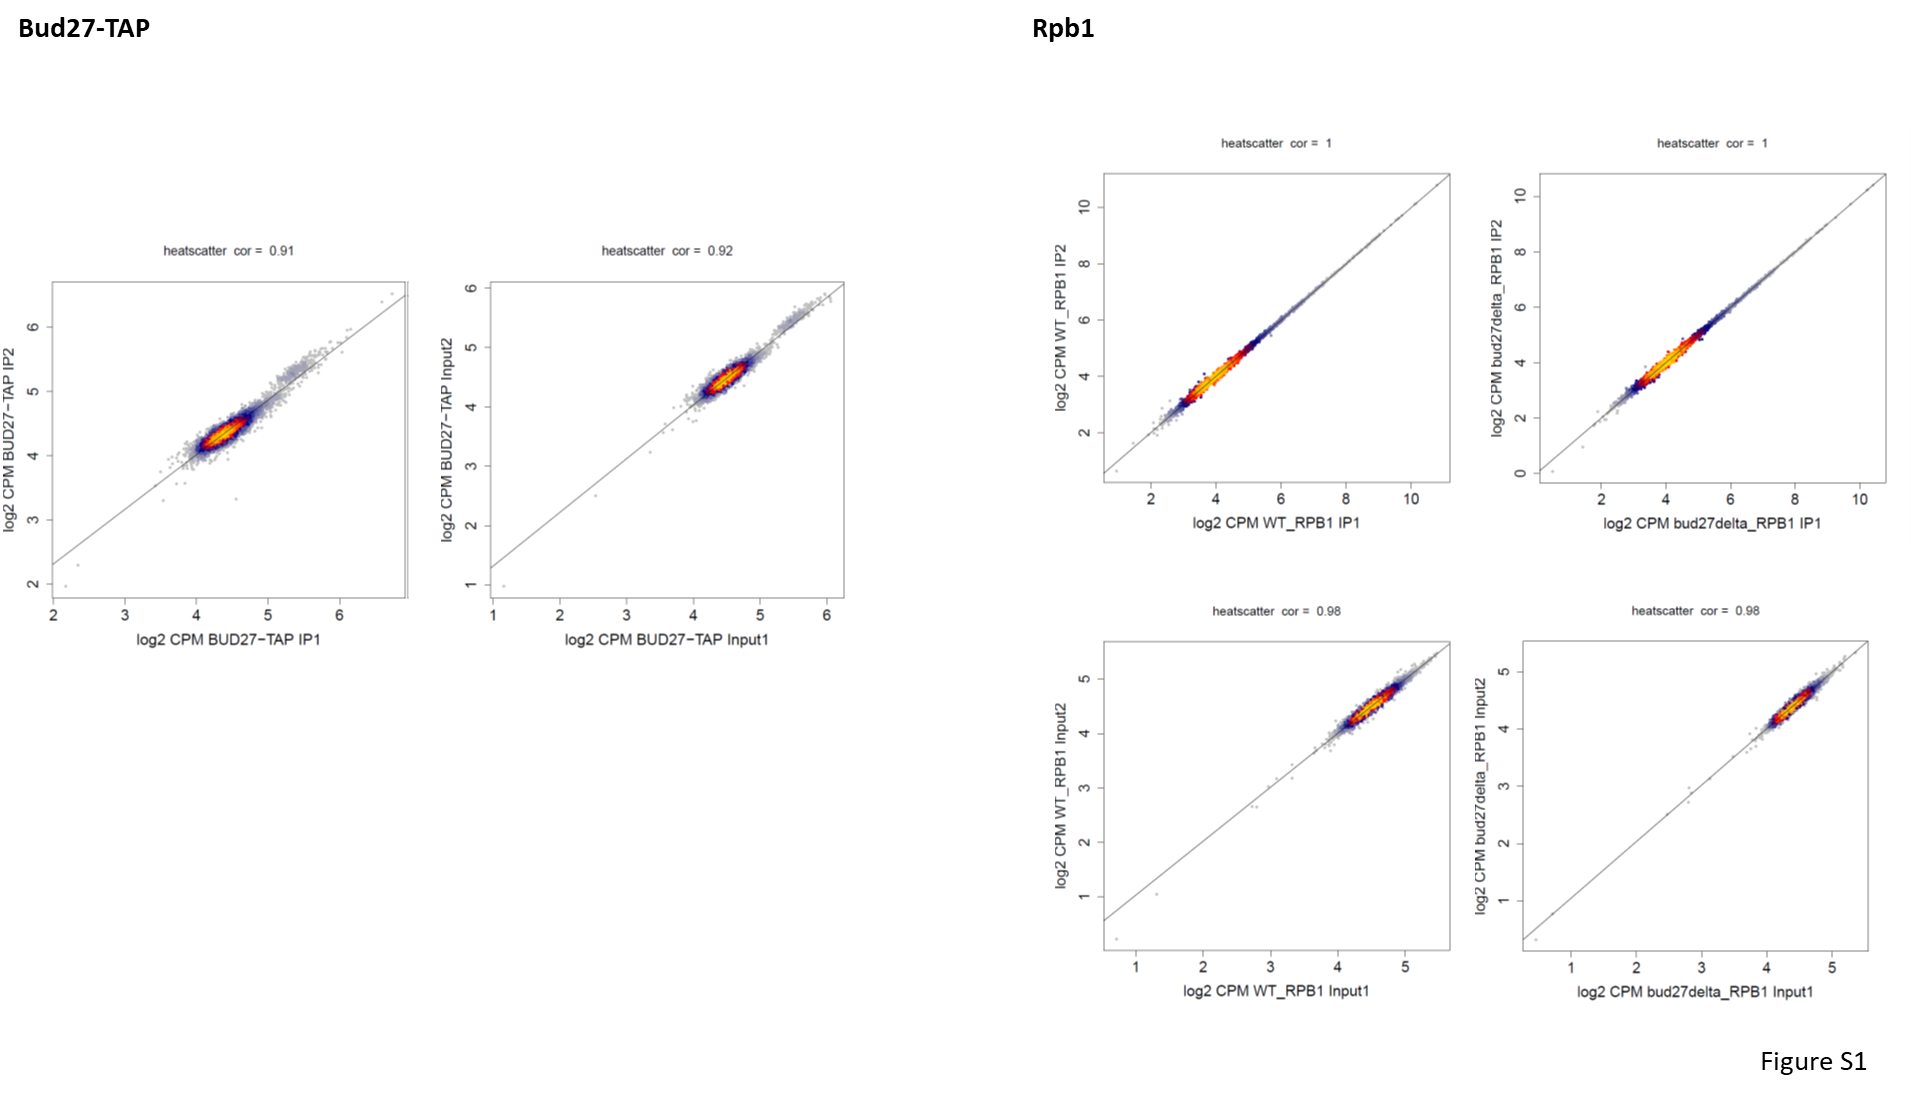
**

**Figure S1. ChIP-Seq analysis.** Comparison of the average normalized ChIP-Seq signal (Bud27-TAP and Rpb1) on protein-coding genes (n=5143) for the two dataset types herein used. Warmer colors indicate the higher density of the overlapping genes. Spearman rank correlation values are indicated.
