# Supplementary material
Source: HighWire-hosted journal article supplement (doi:10.1101/rna.075507.120)
Supplement: Supplemental_Fig_S3.docx [file Supplemental_Fig_S3.docx]

**
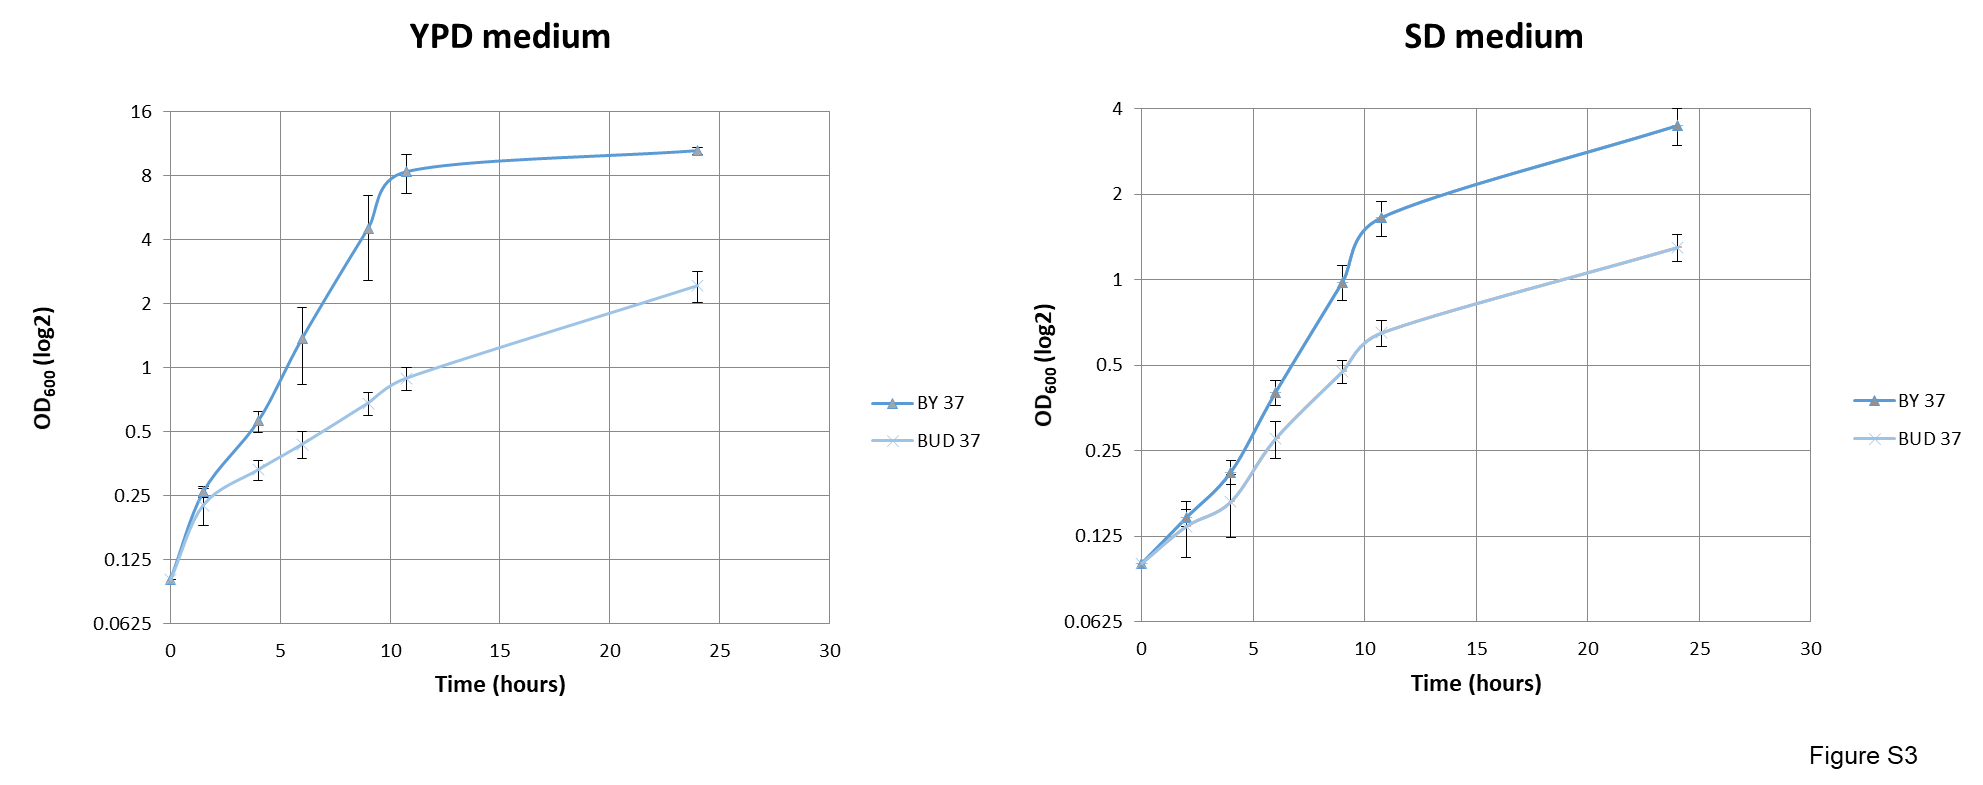
**

**Figure S3. Growth curves of wild-type and *bud27∆* cells**. Yeast strains were grown in liquid YPD or SD media containing 2% glucose, at 30 ºC (time 0), and then shifted to 37 ºC for the indicated time period.
