# Supplementary material
Source: HighWire-hosted journal article supplement (doi:10.1101/rna.075507.120)
Supplement: Supplemental_Fig_S5.docx [file Supplemental_Fig_S5.docx]

**
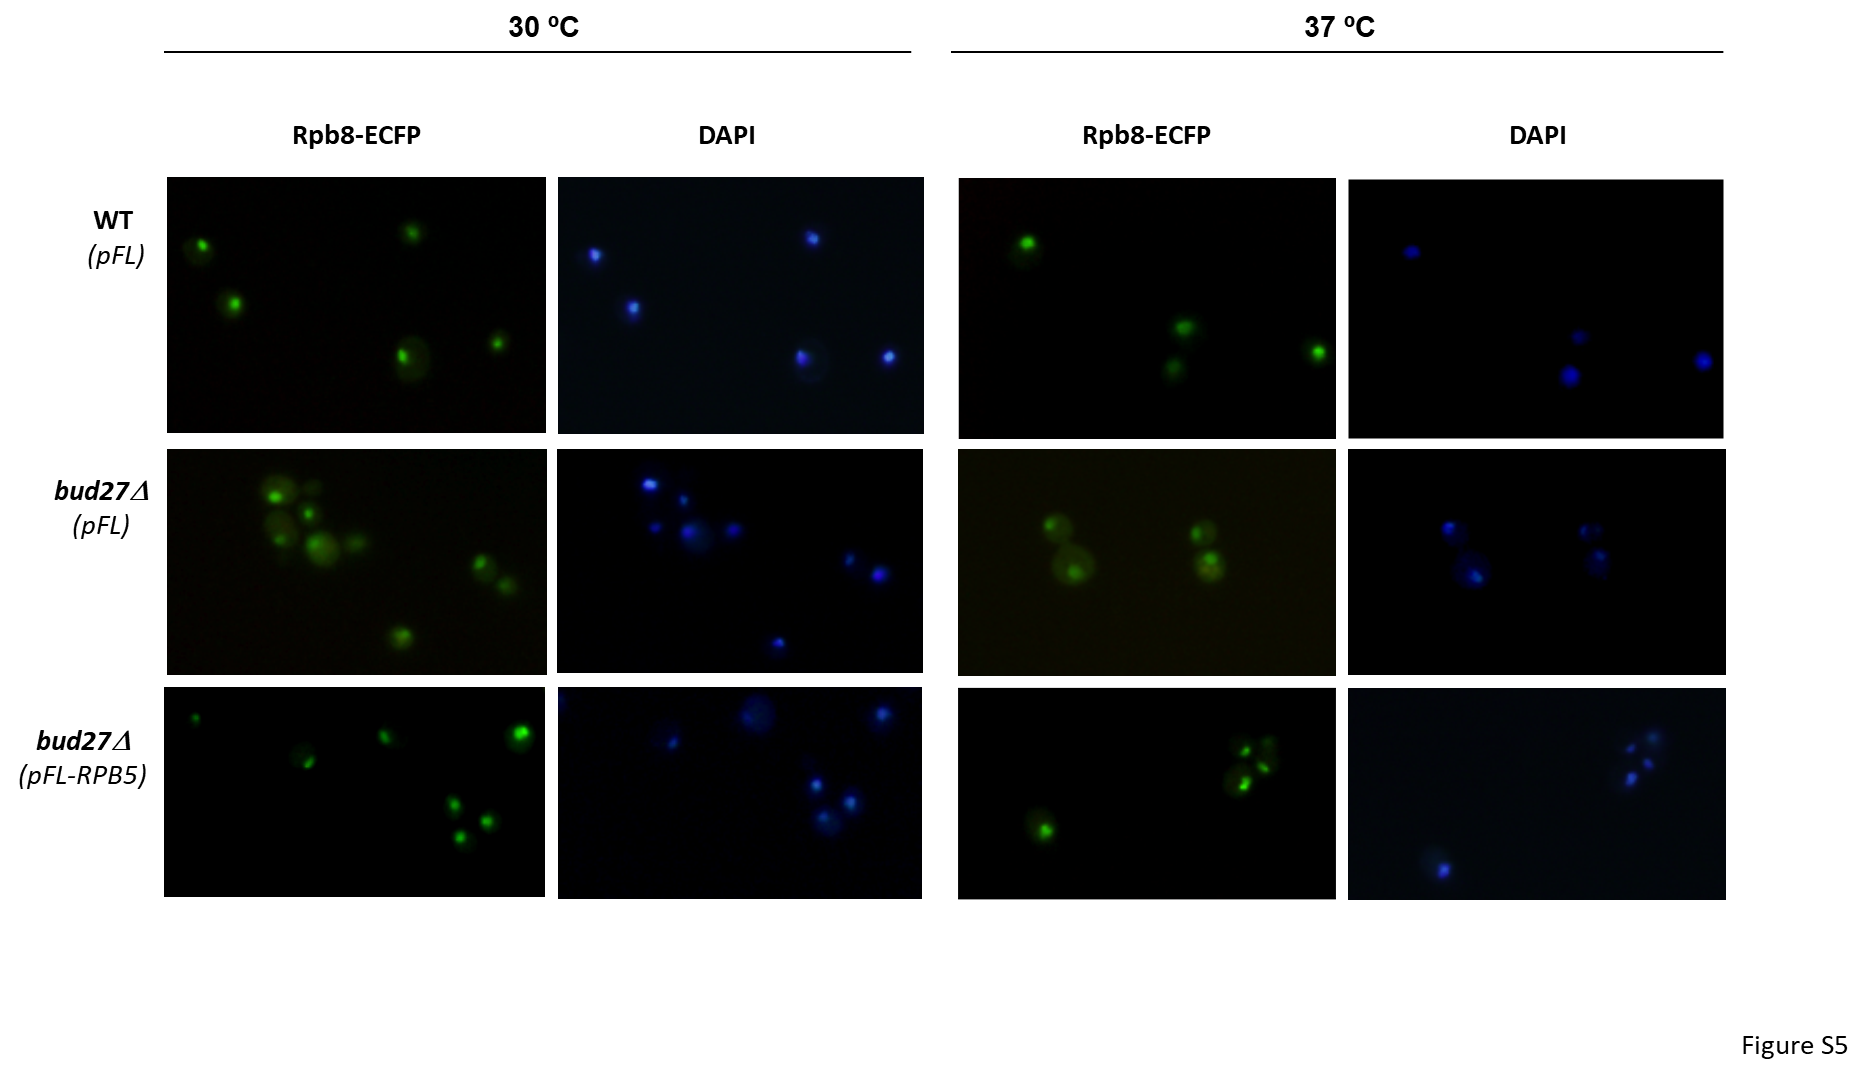
**

**Figure S5. Cytoplasmic RNA pols mislocalization in *bud27* mutant cells is corrected by overexpression of *RPB5*.** Live cell imaging of Rpb8-ECFP in wild-type and *bud27∆* mutant cells at 30 ºC or 37 ºC, containing empty vector (pFL) or overexpressing *RPB5* (pFL-*RPB5*).
