# Supplementary material
Source: HighWire-hosted journal article supplement (doi:10.1101/rna.075507.120)
Supplement: Supplemental_Fig_S6.docx [file Supplemental_Fig_S6.docx]

**
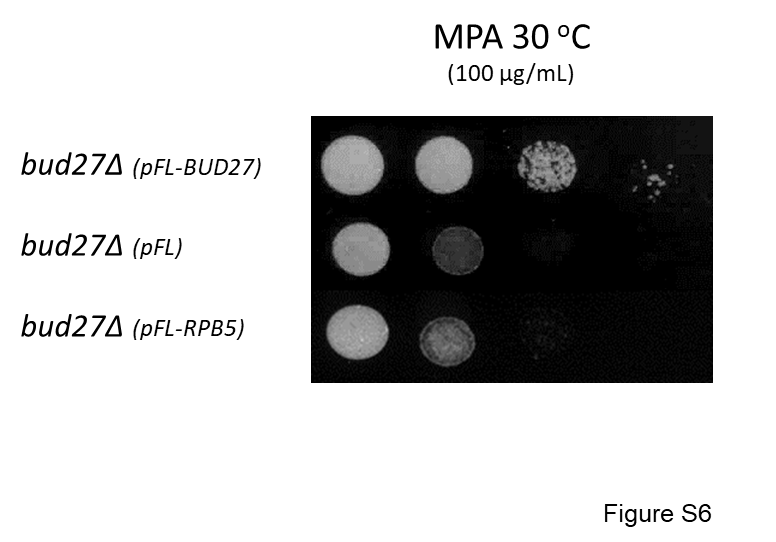
**

**Figure S6. *RPB5* overexpression does not overcome hypersensitivity to mycophenolic acid of *bud27∆* cells.** Growth analysis of the *bud27∆* mutant cells that harbor the indicated plasmids to overexpress *RPB5* or *BUD27*. Cells were grown at 30 ºC in complete SD medium that contained mycophenolic acid (MPA) at the indicated concentration.
