# Supplementary material
Source: HighWire-hosted journal article supplement (doi:10.1101/rna.075507.120)
Supplement: Supplemental_Fig_S7.docx [file Supplemental_Fig_S7.docx]

**
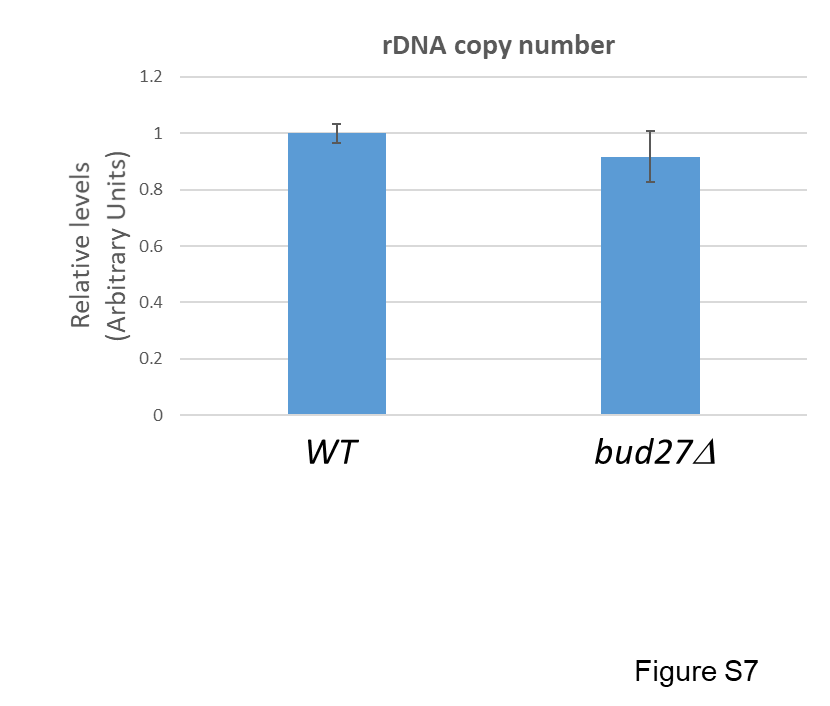
**

**Figure S7. rDNA copy number analysis.** The rDNA copy number was analyzed by qPCR in DNA samples from *bud27∆* and wild-type cells. Oligonucleotides 18S-501 and 18S-301 (see Table S1), which recognize an amplicon of the rDNA unit corresponding to the region of the 25S rRNA, were used. The ratio for the rDNA amplicon to a non-transcribed region of chromosome V was calculated. The average and standard deviations of three biological replicates are shown. Statistical significance by the t-Student test, p=0.0256.
