# Supplementary material
Source: HighWire-hosted journal article supplement (doi:10.1101/rna.075507.120)
Supplement: Supplemental_Fig_S8.docx [file Supplemental_Fig_S8.docx]

**
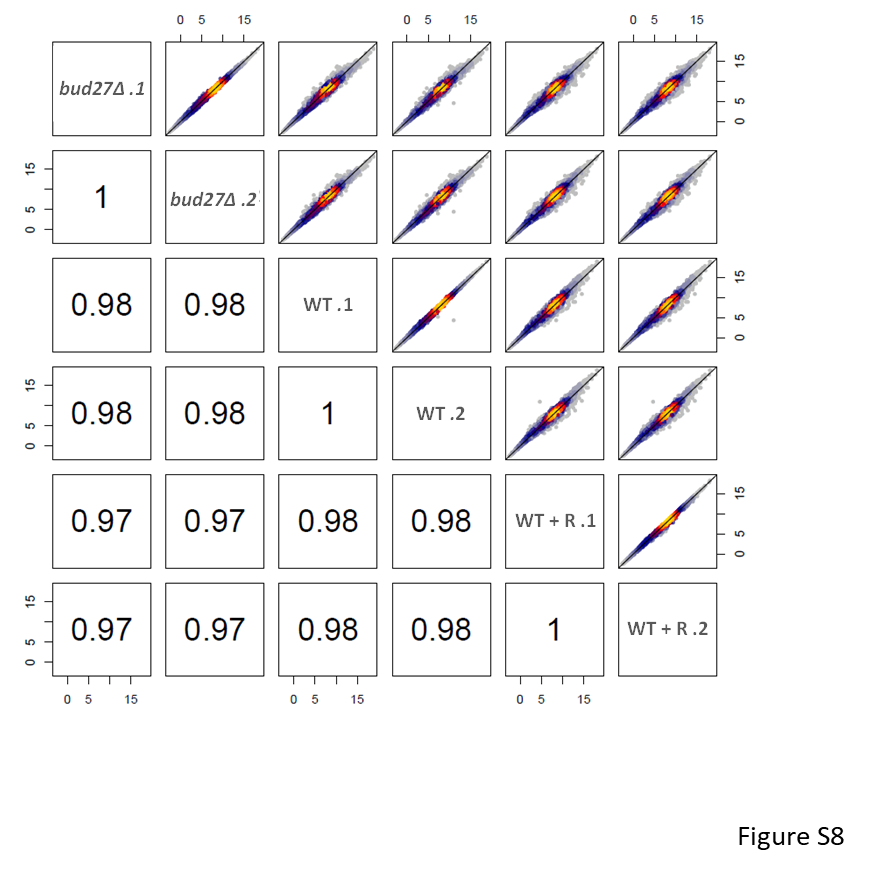
**

**Figure S8. RNA-Seq analysis.** Comparison of the average normalized RNA-Seq signal for the three different datasets herein used. Warmer colors indicate the higher density of the overlapping genes. Spearman rank correlation values are indicated. *bud27∆*, *bud27∆* cells; WT, wild-type cells not treated with rapamycin; WT + R, rapamycin-treated wild-type cells. 1 and 2 indicate two independent biological replicates.
