# Supplementary material
Source: HighWire-hosted journal article supplement (doi:10.1101/rna.075507.120)
Supplement: Supplemental_Fig_S9.docx [file Supplemental_Fig_S9.docx]

**
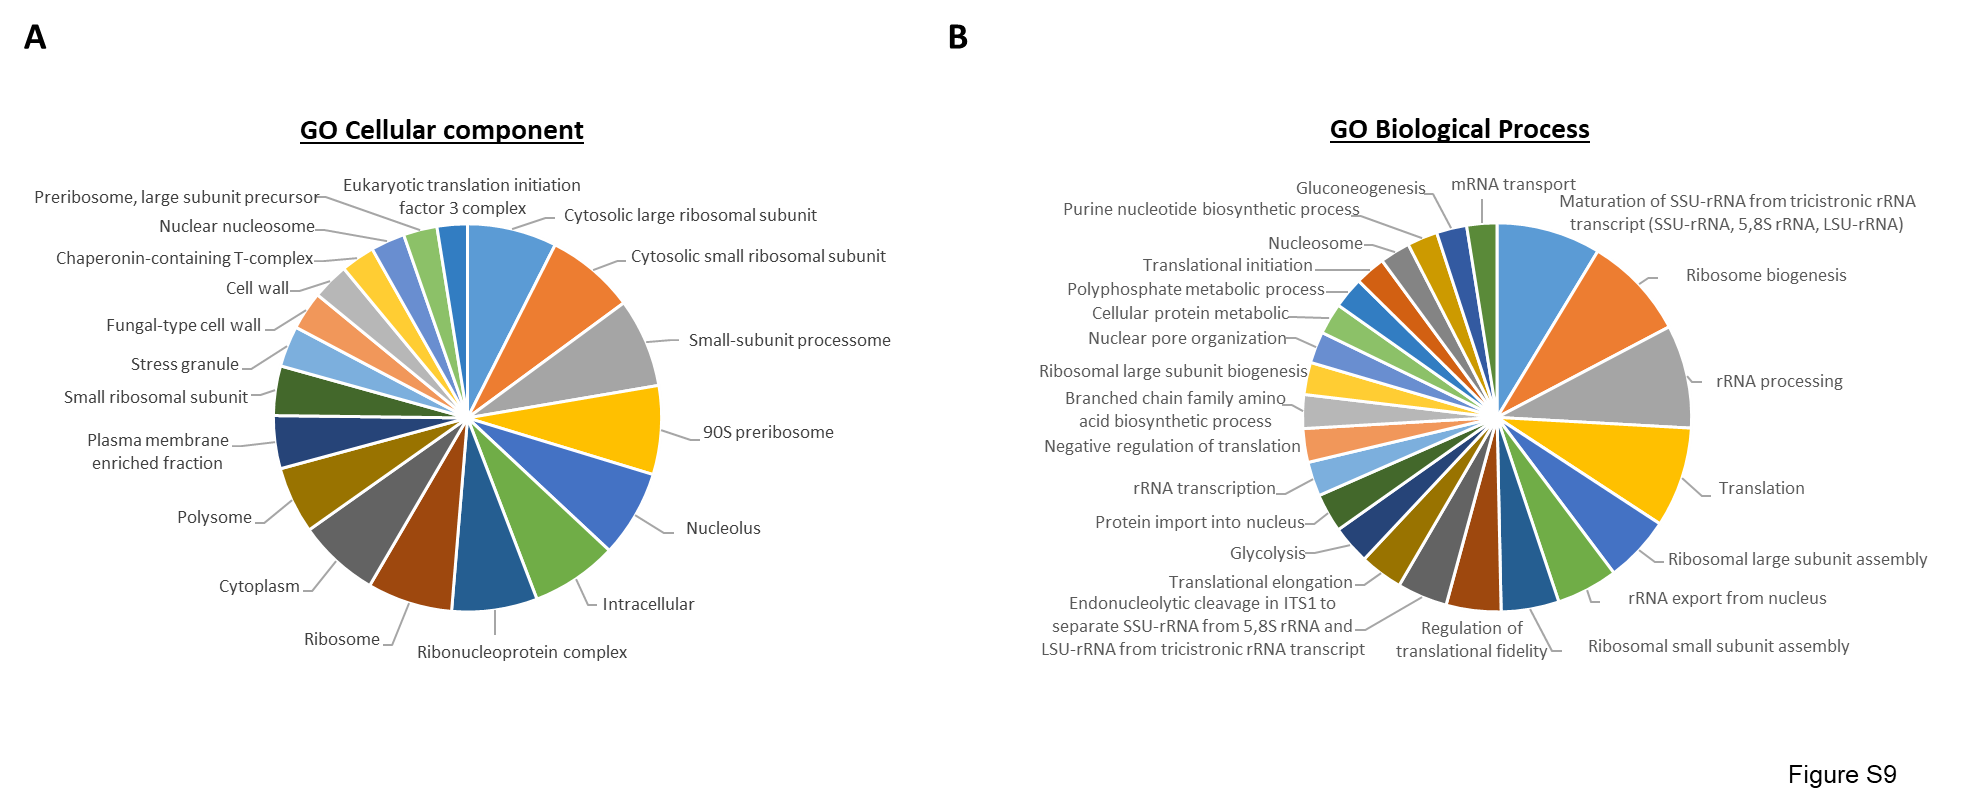
**

**Figure S9. Biological GO categories analyses of the ChIP-Seq data for Bud2-TAP.** The biological GO categories were determined by FunSpec software for the list of genes occupied by Bud27 in the wild-type cells grown in YPD at 30 ºC.
