# Supplementary material
Source: HighWire-hosted journal article supplement (doi:10.1101/rna.075507.120)
Supplement: Supplemental_References.docx [file Supplemental_References.docx]

**SUPPLEMENTAL REFERENCES**

Cuevas-Bermúdez A, Garrido-Godino A, Navarro F. 2019. A novel yeast chromatin-enriched fractions purification approach, yChEFs, for the chromatin-associated protein analysis used for chromatin-associated and RNA-dependent chromatin-associated proteome studies from *Saccharomyces cerevisiae*. *Gene Reports* **16**: 100450.

Cuevas-Bermúdez A, Garrido-Godino AI, Gutiérrez-Santiago F, Navarro F. 2020. A Yeast Chromatin-enriched Fractions Purification Approach, yChEFs, from *Saccharomyces cerevisiae*. *Bio-Protocol* **10**: e3471.

Fernández-Pevida A, Kressler D, de la Cruz J. 2015. Processing of preribosomal RNA in *Saccharomyces cerevisiae*. *Wiley Interdiscip Rev RNA* **6**: 191-209.

García-Gómez JJ, Fernández-Pevida A, Lebaron S, Rosado IV, Tollervey D, Kressler D, de la Cruz J. 2014. Final pre-40S maturation depends on the functional integrity of the 60S subunit ribosomal protein L3. *PLoS Genet* **10**: e1004205.

Henras AK, Plisson-Chastang C, O'Donohue MF, Chakraborty A, Gleizes PE. 2015. An overview of pre-ribosomal RNA processing in eukaryotes. *Wiley Interdiscip Rev RNA* **6:** 225-242.
