# Supplementary material
Source: HighWire-hosted journal article supplement (doi:10.1101/rna.075507.120)
Supplement: Supplemental_Table_S1.docx [file Supplemental_Table_S1.docx]

**Table S1. Oligonucleotides used in this study**

| **Gene (or DNA region)** | **Primer** | **Sequence** |
| --- | --- | --- |
|  |  |  |
| *35S rDNA* 5’ region | 35S-501 | ATTTCCGGCAGCAGAGAGAC |
| 35S-301 | TTTCCCACCTATTCCCTCTTG |
| *35S rDNA* 3’ region | 35S-502 | GGGTTTAGACCGTCGTGAGA |
| 35S-302 | GCATGGATTCTGACTTAGAGG |
| *35S rDNA* promoter | 35S(prom)-501 | TTCCGTATTTTCCGCTTCC |
|  | 35S(prom)-301 | CACTTGTACTCCATGACTAAACCC |
| *18S rDNA* | 18S-501 | CATGGCCGTTCTTAGTTGGT |
|  | 18S-301 | ATTGCCTCAAACTTCCATCG |
| *25S rDNA* | 25S-501 | CAACCGGGATTGCCTTAGTA |
|  | 25S-301 | CACGGGATTCTCACCCTCTA |
| *5S rDNA* | 5S-501 | GCGGCCATATCTACCAGAAA |
|  | 5S-301 | CTGAGTTTCGCGTATGGTCA |
| *tRNALeu3* | tRNALeu3-501 | GGTTGTTTGGCCGAGCGGTC |
|  | tRNALeu3-301 | TTCGAACTCTTGCATCTTACG |
| *SCR1* | SCR1-501 | CGGCCGGGATAGCACATAT |
|  | SCR1-301 | GACACACTCCATCCCCGAG |
| PMA1 5’ region | PMA1p-503 | AAAGGCCAAATATTGTATTATTTTCAA |
|  | PMA1p-302 | TTGGTGTTATAGGAAAGAAAGAGAAAA |
| *PMA1 3’* region | PMA1-6 forw | ATATTGTTACTGTCGTCCGTGTCTGGAT |
|  | PMA1-6 rev | ATTAGGTTTCCTTTTCGTGTTGAGTAGA |
| *ACT1* | ACT1-501 | GCCTTCTACGTTTCCATCCA |
|  | ACT1-301 | GGCCAAATCGATTCTCAAAA |
| *PYK1* | PYK1-4 forw | CTATGGCTGAAACCGCTGTCATTG |
|  | PYK1-4 rev | CAGCTCTTGGGCATCTGGTAAC |
| *RPL2A* | RPL2A-501 | ACCATTGTTGAAGGCTGGTC |
|  | RPL2A-302 | GAGAACCACGTAACAAACC |
| *RPL39* | RPL39-501 | GCTCAAAAGTCTTTCAGAATCAA |
|  | RPL39-301 | TTAGATGTTCATCTTGGTTCTTCTC |
| *RPL3* | RPL3-501 | AAGAAGGCTCATTTGGCTGA |
|  | RPL3-301 | AACACCTTCGAAACCGTGAC |
| *RPL5* | RPL5-501 | AGCTGACGACATTGATGCTG |
|  | RPL5-301 | CACGAGCAGCTCTTTCTTCC |
| *RPS15* | RPS15-502 | GGTTCCGTCGTCGGTATCTA |
|  | RPS15-302 | TGGGATGAAACGGGAAGTAG |
| *RPS2* | RPS2-501 | TGGTAAGTGTGGTTCCGTCA |
|  | RPS2-301 | AATGGAGAAACTGGCAATGG |
| *RPS3* | RPS3-501 | TCTGGTCAACCAGTCAACGA |
|  | RPS3-301 | TGGTTCAGCTTGAGCTTCAGT |
| *RPL26* immature form | RPL26-INM-F | GGTAAGATTTGTTGAAACTCG |
|  | RPL26-INM-R | GCTTTTCTGTCCTTGTCCAAA |
| *RPL26* mature form | RPL26-MAD-F | ATGGCTAAACAATCATTAGA |
|  | RPL26-MAD-R | CTTGTCCAAATGTAATTTAG |
| *LSM7* immature form | LSM7-INM-F | CGTGGCAATAACCTTCCTTT |
|  | LSM7-INM-R | CAAGTTCATCAGTTGATCATAGCC |
| *LSM7* mature form | LSM7-MAD-F | TGCATCAGCAACACTCCAAA |
|  | LSM7-MAD-R | CAAGTTCATCAGTTGATCATAGCC |
| *RPB6* immature form | RPB6-INM-F | ATTGGAGAAATTGCGTGCTT |
|  | RPB6-INM-R | CTTTTGGGATGGCCTTTTCC |
| *RPB6* mature form | RPB6-MAD-F | CAGACTACGAGGAGGCGTT |
|  | RPB6-MAD-R | CTTTTGGGATGGCCTTTTCC |
| *ASC1* immature form | ASC1-INM-F | GATGAATGGTTTAGCATTACTCTGC |
|  | ASC1-INM-R | AAACTTCATCTTGGGCAGAC |
| *ASC1* mature form | ASC1-MAD-F | ACGACAAAATGGTTAAGGCT |
|  | ASC1-MAD-R | AAACTTCATCTTGGGCAGAC |
| Intergenic region (chromosome V) | IntergChrV-F | TGTTCCTTTAAGAGGTGATGGTGAT |
|  | IntergChrV-R | GTGCGCAGTACTTGTGAAAACC |
