# Supplementary material
Source: HighWire-hosted journal article supplement (doi:10.1101/rna.075507.120)
Supplement: Supplemental_Table_S2.docx [file Supplemental_Table_S2.docx]

**Table S2. Probes used in this study for hybridization experiments**

| **Probe** | **Sequence** |
| --- | --- |
|  |  |
| Probe b (18S) | CATGGCTTAATCTTTGAGAC |
| Probe c (3-D/A2) | GACTCTCCATCTCTTGTCTTCTTG |
| Probe d (A2/A3) | TGTTACCTCTGGGCCC |
| Probe e (5.8S) | TTTCGCTGCGTTCTTCATC |
| Probe f (E/C2) | GGCCAGCAATTTCAAGTTA |
| Probe g (C1/C2) | GAACATTGTTCGCCTAGA |
| Probe h (25S) | CTCCGCTTATTGATATGC |
| Probe 5S | GGTCACCCACTACACTACTCGG |
| Sup56 | CCTTAGACCGCTCGGCCAAA |
| tRNAiMet | TCGTTTCGATCCCGAGGACATCAGGGTTATGA |
| tRNAeMet | TCGGTTTCGATCCCGAGGACATCAGGGTTATGA |
| tRNAIle | TGCTCGAGGTGGGGTTGAACCCACGACGG |
